# Supplementary material for: Predicting In Vitro and In Vivo Anti-SARS-CoV-2 Activities of Antivirals by Intracellular Bioavailability and Biochemical Activity
Source: PubMed Central journal article supplement — ACS Omega. 2022 Nov 29;7(49):45023–35. doi: 10.1021/acsomega.2c05376 (PMC9753181; doi:10.1021/acsomega.2c05376), 2022-11-29
Supplement: ao2c05376_si_001.pdf [file ao2c05376_si_001.pdf]

---

## Supplement information

### **Predict *in vitro* and *in vivo* anti-SARS-CoV-2 activity of antivirals by intracellular bioavailability and biochemical activity**

**Jinwen Zhang<sup>1,#</sup>, Mingfeng He<sup>2,#</sup>, Qian Xie<sup>1,3,#</sup>, Ailing Su<sup>1</sup>, Kuangyang Yang<sup>2</sup>, Lichu Liu<sup>2</sup>, Jianhui Liang<sup>1,3</sup>, Ziqi Li<sup>1</sup>, Xiuxin Huang<sup>4</sup>, Jianshu Hu<sup>5</sup>, Qian Liu<sup>1</sup>, Bing Song<sup>1</sup>, Chun Hu<sup>3</sup>, Lei Chen<sup>6</sup>, Yan Wang<sup>1\*</sup>**

<sup>1</sup>Center for Translation Medicine Research and Development, Shenzhen Institutes of Advanced Technology, Chinese Academy of Sciences, Shenzhen 518055, China

<sup>2</sup>Institute of Orthopedics and Traumatology, Foshan Hospital of Traditional Chinese Medicine, Foshan 528000, China

<sup>3</sup>Key Laboratory of Structure-based Drug Design & Discovery (Ministry of Education), School of Pharmaceutical Engineering, Shenyang Pharmaceutical University, Shenyang 110016, China

<sup>4</sup>The First Clinical College of Changsha Medical College, Changsha 410219, China

<sup>5</sup>Department of Pharmacology, University of Oxford, OX1 3QT, UK

<sup>6</sup>School of Life Science and Technology, Key Laboratory of Developmental Genes and Human Disease, Southeast University, Nanjing 210096, China

#These authors contributed equally to this work.

**\*Correspondences:** Dr. Yan Wang, Center for Translation Medicine Research and Development, Shenzhen Institutes of Advanced Technology, Chinese Academy of Sciences, Shenzhen 518055, China; Tel.: +86-755-2641-7985; E-mail: yan.wang@siat.ac.cn

---

**Figure S1.** Antiviral drugs did not change expression levels of IFN-activated genes

**Figure S2.** High expression of TMPRSS2 in the AT2 cells of lung

**Figure S3.** Overexpression of ACE2 in A549 cells

**Figure S4.** RDV quality control by analytical HPLC

**Figure S5.** GS-441524 quality control by analytical HPLC

**Figure S6.** FAV quality control by analytical HPLC

**Figure S7.** CQ quality control by analytical HPLC

**Figure S8.** HCQ quality control by analytical HPLC

**Table S1.** Comparison of the predicted EC<sub>50</sub> and the lung concentration of RDV

**Table S2.** Lung concentration of GS-441524

**Table S3.** Comparison of the predicted EC<sub>50</sub> and the lung concentration of FAV

**Table S4.** Comparison of the predicted EC<sub>50</sub> and the lung concentration of HCQ/CQ

**Table S5.** Primers used in this study

**Table S6.** Final concentrations of different drugs in the accumulation assay

**Table S7.** Chromatographic and Mass condition of RDV and GS-441524

**Table S8.** Specific concentration to make D=100

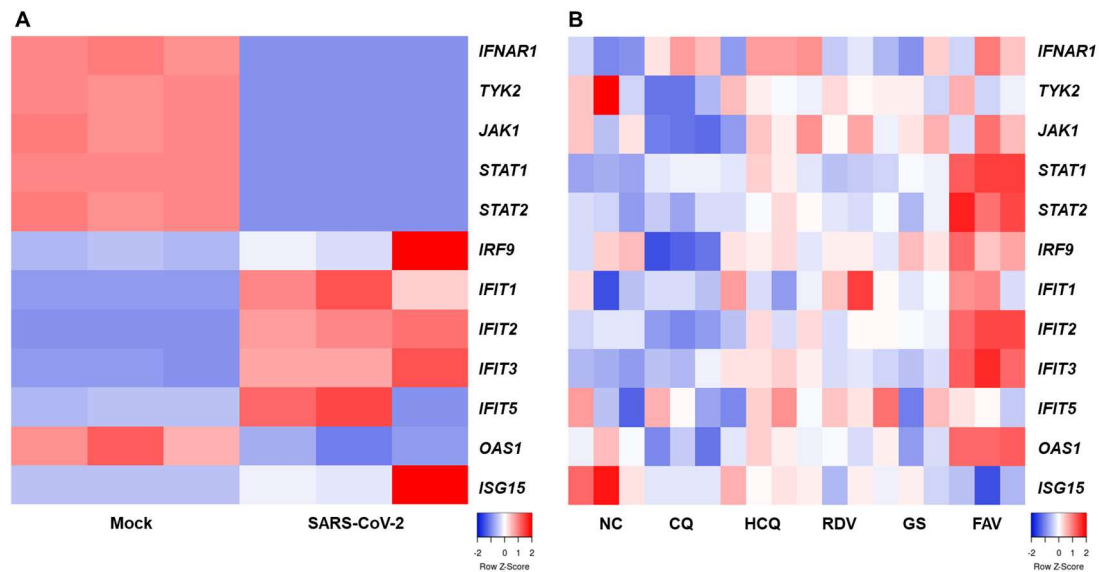

**Figure S1.** (A) SARS-CoV-2 activate IFN related genes in Vero E6 cells (n = 3 biological replicates). Data source: GSE161881. (B) Antiviral drugs did not change expression levels of IFN-activated genes compared to the vehicle controls (n = 3 biological replicates, FDR < 0.001). Cells were treated with or without antivirals at their corresponding EC<sub>50</sub> values for 48 h and then collected for bulk RNA sequencing. Statistical tests were embedded in DESeq2. NC: Negative control (DMSO vehicle group); CQ: chloroquine; HCQ: hydroxychloroquine; RDV: remdesivir; GS: GS-441524; FAV: favipiravir. Heatmap was generated by online service <http://heatmapper.ca/>.

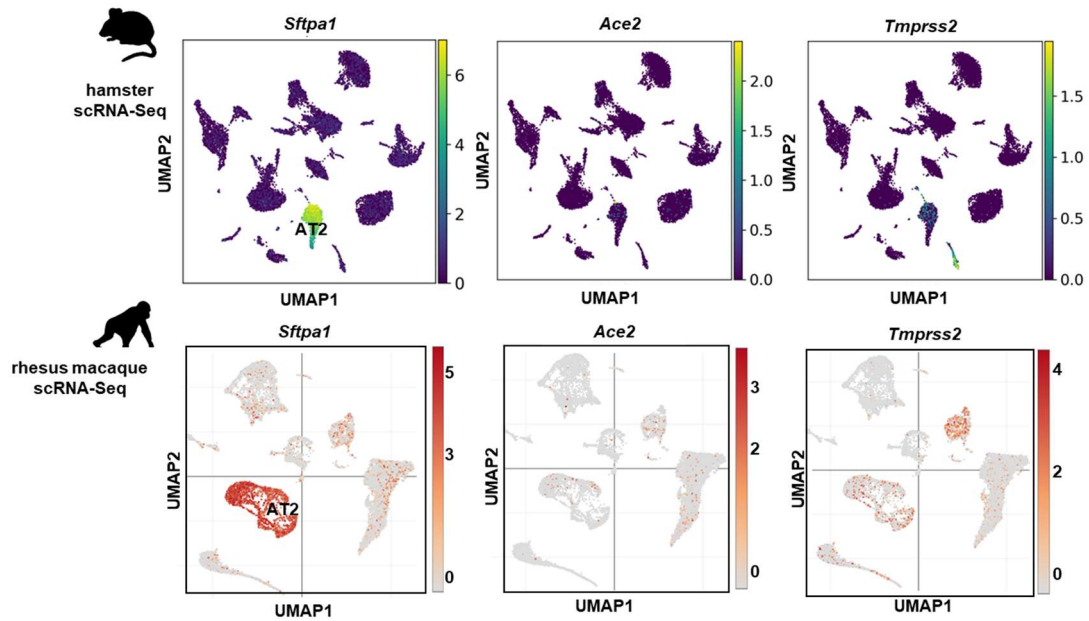

**Figure S2.** High expression of *TMPRSS2* in the AT2 cells of lung might partially explain why HCQ lost its antiviral activity *in vivo*. SARS-CoV-2 infects cells through *TMPRSS2*-mediated membrane fusion or cysteine protease cathepsin L (CTSL)-mediated endocytosis. The spike protein of SARS-CoV-2 is activated by the endosomal-pH-dependent CTSL. HCQ has the capability of increasing endosomal pH, therefore inhibiting CTSL-mediated endocytosis. Unlike CTSL, *TMPRSS2*-mediated cell entry is pH-independent, which cannot be blocked by HCQ. Therefore, high expression of *TMPRSS2* can abolish antiviral activity of HCQ *in vitro*. The scRNA-seq data of hamster lung (GSE162208) were re-analyzed and visualized by Scanpy. The scRNA-seq data of rhesus macaque lung were visualized by Single Cell Portal - Broad Institute, available from <https://singlecell.broadinstitute.org>.

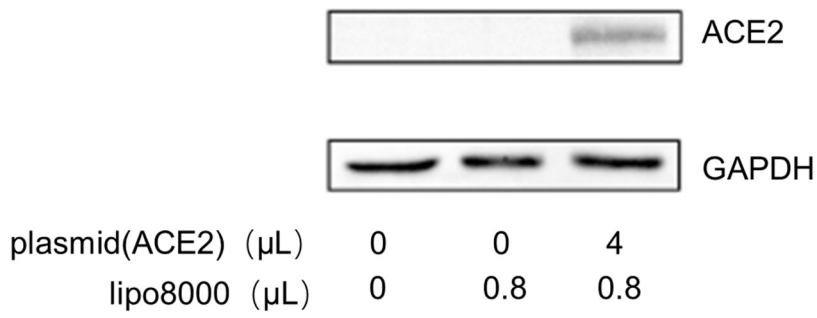

**Figure S3.** Overexpression of ACE2 in the A549 cells was confirmed by western blot. Confluent A549 cells were transfected with pcDNA3.1-ACE2-Flag plasmid (Beyotime, China) for 24 hours, and then collected for western blot.

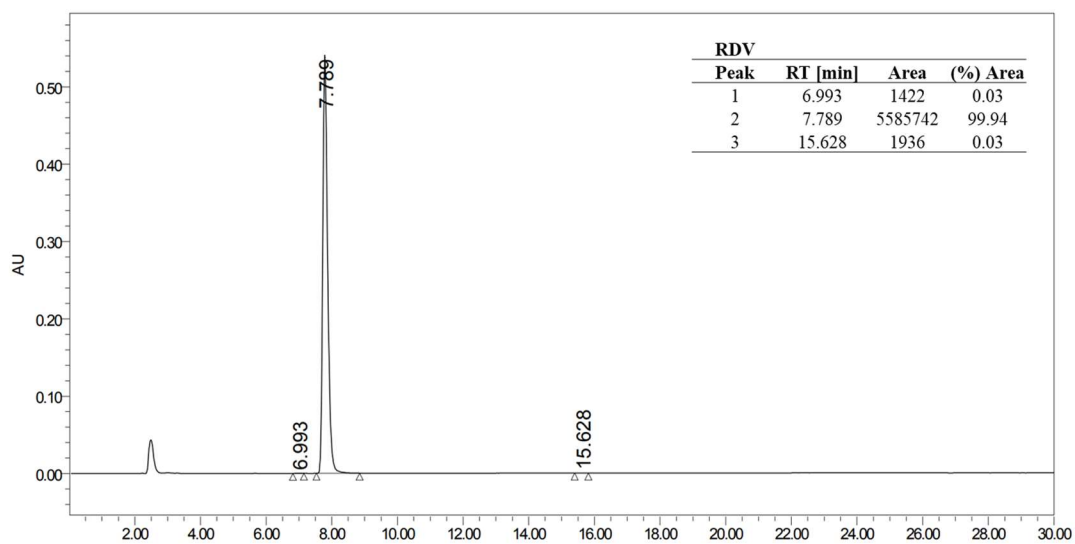

**Figure S4.** RDV quality control by analytical HPLC

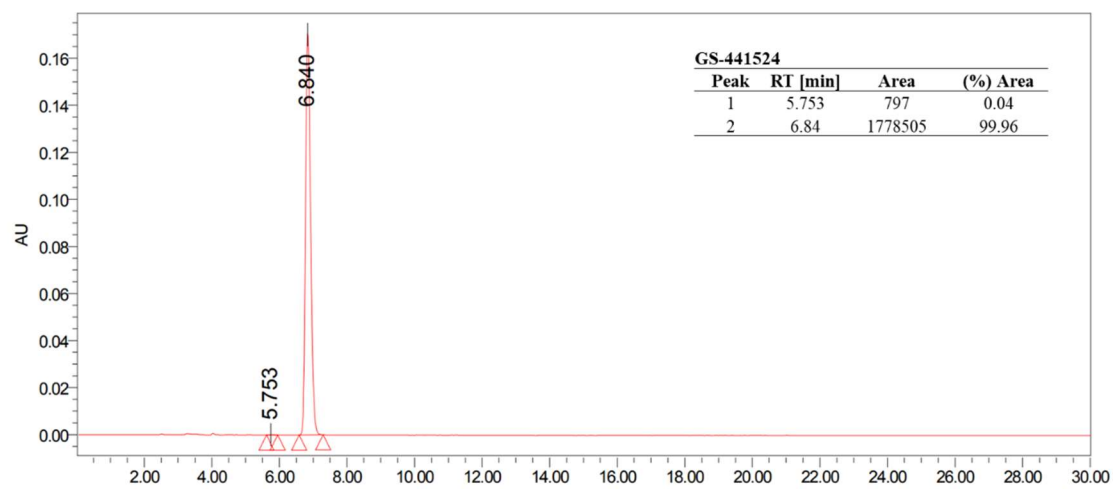

**Figure S5.** GS-441524 quality control by analytical HPLC

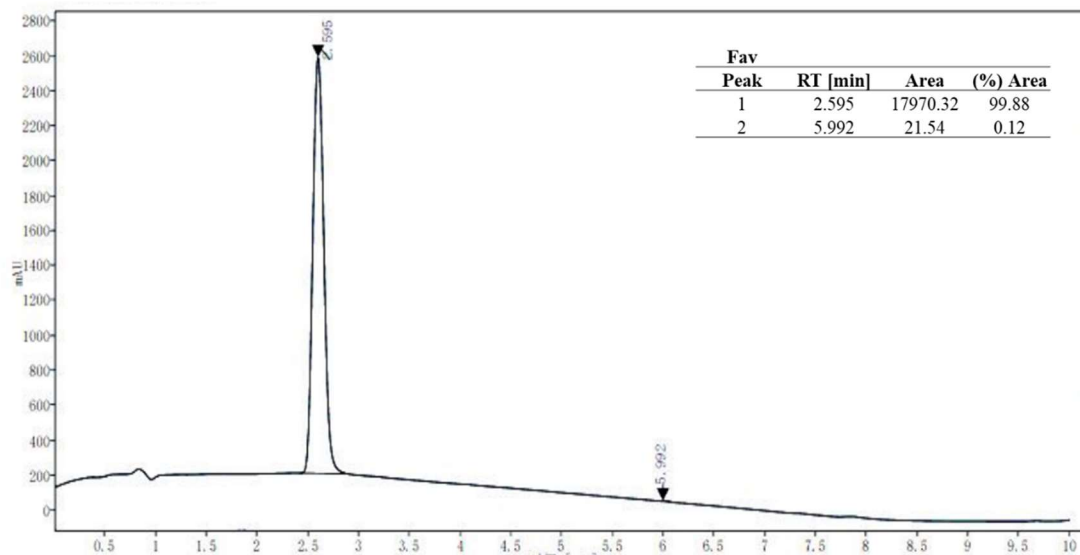

**Figure S6.** FAV quality control by analytical HPLC



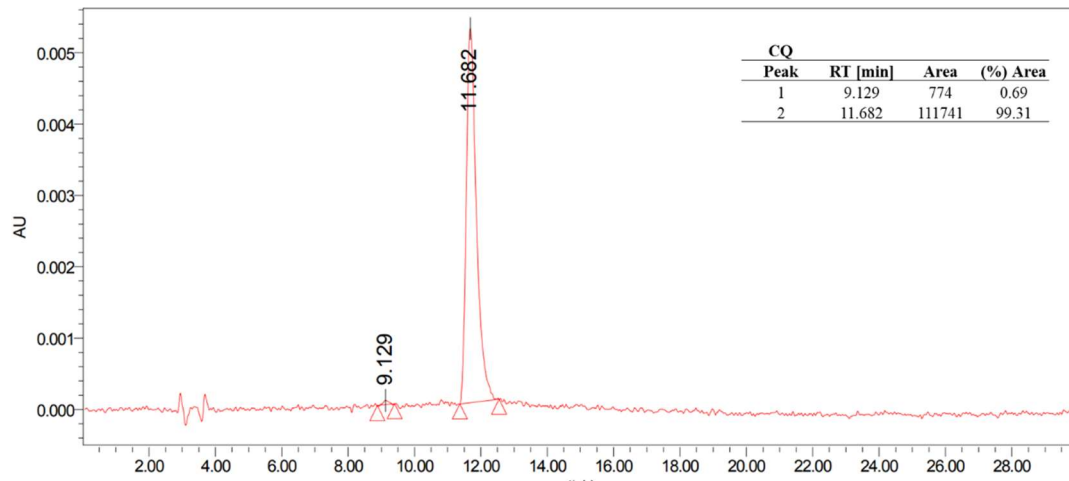

**Figure S7.** CQ quality control by analytical HPLC

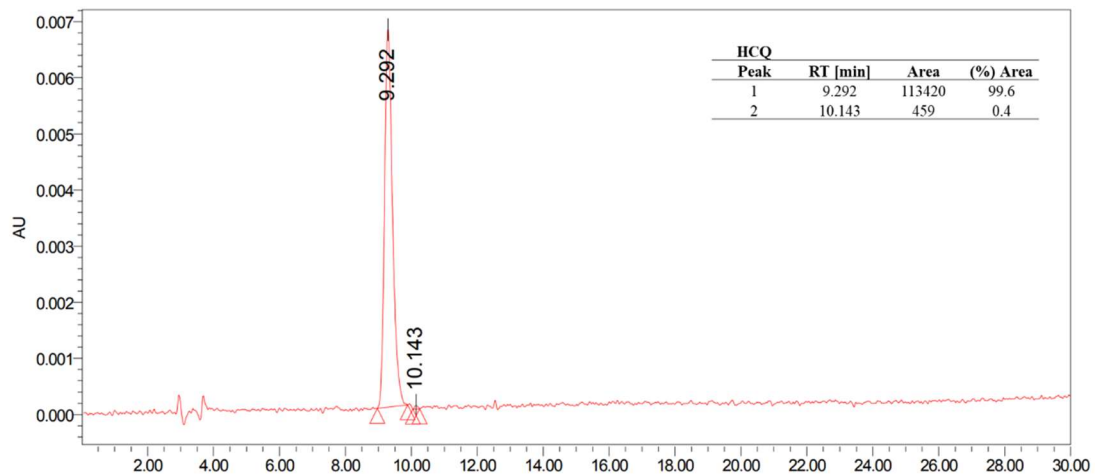

**Figure S8.** HCQ quality control by analytical HPLC

**Table S1. Comparison of the predicted EC<sub>50</sub> and the lung concentration of RDV**

| Verapamil-treated Vero E6 Predicted EC <sub>50</sub> [ $\mu$ M] |    |        |
|-----------------------------------------------------------------|----|--------|
| K <sub>p</sub>                                                  |    | 20.15  |
| F <sub>u,cell</sub>                                             |    | 0.0014 |
| F <sub>ic</sub>                                                 |    | 0.03   |
| Biochemical pIC <sub>50</sub>                                   |    | 7.49   |
| Predicted EC <sub>50</sub> [ $\mu$ M]                           |    | 1.07   |
| Mice Lung concentration of RDV [nmol/kg]                        |    |        |
| RDV 20 mg/kg                                                    | 1h | 308    |
|                                                                 | 2h | 527    |

**Table S2. Lung concentration of GS-441524**

| Treatment                        | GS-441524 [nmol/kg] |
|----------------------------------|---------------------|
| Mice, RDV 20 mg/kg, iv           | 14237               |
| Rhesus macaque, RDV 10 mg/kg, iv | 2674                |
| Mice, GS-441524 20 mg/kg, po     | 1807                |

**Table S3. Comparison of the predicted EC<sub>50</sub> and the lung concentration of FAV**

| Verapamil-treated Vero E6 Predicted EC <sub>50</sub> [ $\mu$ g/g] |  |       |
|-------------------------------------------------------------------|--|-------|
| K <sub>p</sub>                                                    |  | 4.01  |
| F <sub>u,cell</sub>                                               |  | 0.013 |
| F <sub>ic</sub>                                                   |  | 0.05  |
| Biochemical pIC <sub>50</sub>                                     |  | 5.00  |
| Predicted EC <sub>50</sub> [ $\mu$ g/ml]                          |  | 32.00 |
| Mice Lung concentration of FAV [ $\mu$ g/g]                       |  |       |
| FAV 6.25 mg, ip                                                   |  | 50.2  |
| FAV 12.5 mg, ip                                                   |  | 90.7  |
| FAV 25 mg, ip                                                     |  | 216   |

**Table S4. Comparison of the predicted EC<sub>50</sub> and the lung concentration of HCQ/CQ**

| Verapamil-treated Vero E6 Predicted EC <sub>50</sub> [ $\mu$ M] |  |         |         |
|-----------------------------------------------------------------|--|---------|---------|
|                                                                 |  | HCQ     | CQ      |
| K <sub>p</sub>                                                  |  | 1956    | 2616    |
| F <sub>u,cell</sub>                                             |  | 0.00024 | 0.00023 |
| F <sub>ic</sub>                                                 |  | 0.46944 | 0.60168 |
| Biochemical pIC <sub>50</sub>                                   |  | 3.47    | 3.35    |
| Predicted EC <sub>50</sub> [ $\mu$ M]                           |  | 724.27  | 747.91  |
| Lung concentration of HCQ [ $\mu$ mol/kg]                       |  |         |         |
| HCQ 50 mg/kg, ip, hamster                                       |  | 93      |         |
| HCQ 50 mg/kg, ip, rhesus macaque                                |  | 30      |         |

**Table S5. Primers used in this study**

| Primer name  |         | Species | Sequence(5'>3')           |
|--------------|---------|---------|---------------------------|
| <i>GAPDH</i> | Forward | Human   | CAGTGCCAACGTGTCAGTGGTG    |
|              | Reverse | Human   | GTAGCCCAGGATGCCCTTGAG     |
| <i>ABCB1</i> | Forward | Human   | AATGGCTACATGAGAGCGGAG     |
|              | Reverse | Human   | AATGTTCTGGCTTCCGTTGC      |
| <i>CTSA</i>  | Forward | Human   | AAACTAGTGCCGGACAGACG      |
|              | Reverse | Human   | GTGGTGGACGTGTTTGCTTC      |
| <i>HINT1</i> | Forward | Human   | TGTTCTTGGAGGTCGGCAA       |
|              | Reverse | Human   | AACGCAACACTCAGAGAGACT     |
| <i>ABCC4</i> | Forward | Human   | GGCCAAACCTCTAACCGACA      |
|              | Reverse | Human   | TCATCCCGTTAGCAAGAGCC      |
| <i>HPRT1</i> | Forward | Human   | AAAGGACCCACGAAGTGTT       |
|              | Reverse | Human   | TACAAGAAAGTTGGGTAGGCTTTGT |
| <i>GAPDH</i> | Forward | Monkey  | TCCAAAATCAAGTGGGGCGA      |
|              | Reverse | Monkey  | AACATAGGGGCGTCAGCAG       |
| <i>ABCB1</i> | Forward | Monkey  | GCGAGAACATTCCTCCTCGAA     |
|              | Reverse | Monkey  | GGCCCGGATTGACTGAATGT      |
| <i>CTSA</i>  | Forward | Monkey  | GATCGGTGCGCGGTAGAG        |
|              | Reverse | Monkey  | GGCTGTTCTCGGGATCCTTC      |
| <i>HINT1</i> | Forward | Monkey  | GGAGCTCAAGACCAGGAACTT     |
|              | Reverse | Monkey  | CCAGGGTAGAGGCTCGAAAG      |
| <i>ABCC4</i> | Forward | Monkey  | GACAACCTGGTATGCCTTGCC     |
|              | Reverse | Monkey  | CCACATTTGCCGTTGCTTCA      |
| <i>HPRT1</i> | Forward | Monkey  | CCTGCTTCTCCTCAGCTT        |
|              | Reverse | Monkey  | TCACTAATCACGACGCCAGG      |

**Table S6. Final concentrations of different drugs in the accumulation assay**

| Drug name          | Concentration ( $\mu$ M) |
|--------------------|--------------------------|
| chloroquine        | 20                       |
| hydroxychloroquine | 20                       |
| favipiravir        | 65                       |
| remdesivir         | 10                       |
| GS-441524          | 10                       |

**Table S7. Chromatographic and Mass condition of RDV and GS-441524**

| Chromatographic condition |                     |                    |                       |
|---------------------------|---------------------|--------------------|-----------------------|
|                           | Time (min)          | Mobile phase A (%) | Mobile phase B (%)    |
| remdesivir                | 0                   | 95                 | 5                     |
|                           | 1                   | 10                 | 90                    |
|                           | 2.8                 | 10                 | 90                    |
|                           | 3                   | 95                 | 5                     |
|                           | 6                   | 95                 | 5                     |
| GS-441524                 | 0                   | 97                 | 3                     |
|                           | 1.5                 | 20                 | 80                    |
|                           | 2.8                 | 20                 | 80                    |
|                           | 3                   | 97                 | 3                     |
|                           | 6.5                 | 97                 | 3                     |
| MS condition              |                     |                    |                       |
|                           | Precursor ion (m/z) | Product ion (m/z)  | Collision energy (eV) |
| remdesivir                | 603                 | 402                | 22                    |
| GS-441524                 | 292                 | 202                | 22                    |

**Table S8. Specific concentration to make D=100**

| Cell line | D   | Cell volume ( $\mu\text{L}$ ) | Concentration (cells/ml) |
|-----------|-----|-------------------------------|--------------------------|
| A549      | 100 | 9.05E-07                      | 1105275                  |
| Vero E6   | 100 | 2.57E-06                      | 388747                   |
| Calu-3    | 100 | 4.19E-06                      | 238739                   |
